# Supplementary material for: Transfer printing of CVD graphene FETs on patterned substrates
Source: Royal Society of Chemistry journal article supplement (doi:10.1039/c5nr03501e), 2015-01-01
Supplement: c5nr03501e1.pdf [file c5nr03501e1.pdf]

Supplementary Information:

**Transfer Printing of CVD Graphene FETs on Patterned Substrates**

T. S. Abhilash<sup>1</sup>, R. De Alba<sup>1</sup>, N. Zhelev<sup>1</sup>, H. G. Craighead<sup>2</sup> and J. M. Parpia<sup>1</sup>

<sup>1</sup>Department of Physics, Cornell University, Ithaca, NY 14853, USA.

<sup>2</sup>School of Applied and Engineering Physics, Cornell University, Ithaca, NY 14853, USA.

E-mail: jmp9@cornell.edu

1) Graphene FET device structure:

The graphene channel field effect transistor device structure and the circuit diagram used for measurement of source-drain current as a function of back-gate bias is shown in Fig.S1. Here graphene is transferred on to pre-patterned source-drain electrodes.

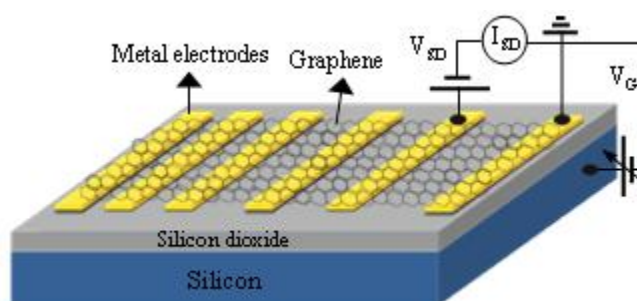

Fig.S1: Illustration of graphene device structure and the circuit diagram corresponding to measurement of  $I_{SD}$  ( $V_G$ ).

2) Scanning Electron Microscopy Image:

High magnification SEM image of a selected area of graphene transferred to Si/SiO<sub>2</sub> substrate is shown in Fig. S2.

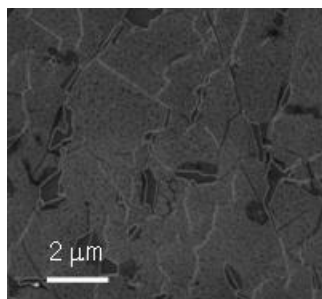

Fig.S2: SEM image of graphene transferred to Si/SiO<sub>2</sub> substrate.

### 3) SEM and AFM Analysis:

Fig.S3 shows SEM and AFM amplitude error images ( $10\text{ }\mu\text{m} \times 10\text{ }\mu\text{m}$ ) acquired at boundary between graphene on Ti/Au metal contact and Si/SiO<sub>2</sub> substrate. AFM amplitude error image showed best sensitivity to the presence of graphene. AFM image confirmed the coverage of graphene over Si/SiO<sub>2</sub> substrate. SEM image shows the continuous coverage of graphene over substrate and metal contacts.

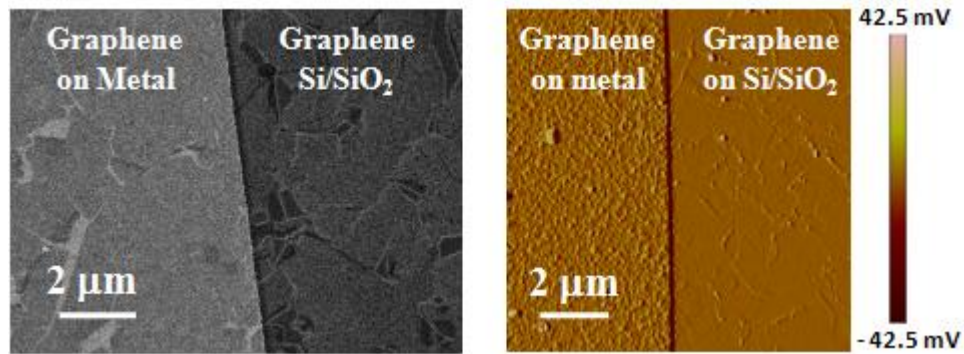

Fig.S3: SEM and AFM amplitude error images acquired at boundary between graphene on Ti/Au metal contact and Si/SiO<sub>2</sub> substrate.
